# Supplementary material for: Standardization of Raman spectra using variable penalty dynamic time warping
Source: Royal Society of Chemistry journal article supplement (doi:10.1039/d1ay00541c), 2021-01-01
Supplement: d1ay00541c1.pdf [file d1ay00541c1.pdf]

## Supporting information

# **Standardization of Raman Spectra using Variable Penalty Dynamic Time Warping**

Qingyu Xu<sup>1</sup>, Hongju Chen<sup>2</sup>, Shaoqing Ye<sup>2</sup>, Yongming Zeng<sup>2</sup>, Hongmei Lu<sup>1</sup>, Zhimin Zhang<sup>1,\*</sup>

1. College of Chemistry and Chemical Engineering, Central South University, Changsha 410083, PR  
China.

2. Xiamen PERSer Nanotechnology Co. Ltd., Xiamen 361005, China

*E-mail: [zmzhang@csu.edu.cn](mailto:zmzhang@csu.edu.cn)*

---

## **Contents:**

Fig.S1 Standardization result and warping path between i-Raman Plus / PERS-D900-R spectrometer. (a-b) the fused spectra of i-Raman Plus/ PERS-D900-R, which before and after standardization (c) Warping path between i-Raman Plus/ PERS-D900-R spectrometer.

Fig.S2 Standardization result and warping path between i-Raman Plus / A5 268137R spectrometer. (a-b) the fused spectra of i-Raman Plus./ A5 268137R which before and after standardization (c) Warping path between i-Raman Plus./ A5 268137R spectrometer.

Fig.S3 Standardization result and warping path between i-Raman Plus / PERS-F900 spectrometer. (a-b) the fused spectra of i-Raman Plus./ PERS-F900, which before and after standardization (c) Warping path between i-Raman Plus./ PERS-F900 spectrometer .

Fig.S4 Standardization result and warping path between i-Raman Plus / PERS-D600 spectrometer. (a-b) the fused spectra of i-Raman Plus / PERS-D600, which before and after standardization (c) Warping path between i-Raman Plus / PERS-D600 spectrometer .

Fig.S5 Standardization result and warping path between i-Raman Plus / PERS-SR530 spectrometer. (a-b) the fused spectra of i-Raman Plus / PERS-SR530, which before and after standardization (c) Warping path between i-Raman Plus / PERS-SR530 spectrometer .

Table S1. Details of the standardized results of each group of Raman instruments

Table S2. Results of Raman standardization between RS-VPdtw and MWFFT

Table S3. The result of control experiment using RS-VPdtw

Table S4. MWFFT standardized results preprocessed by airPLS and ALS method

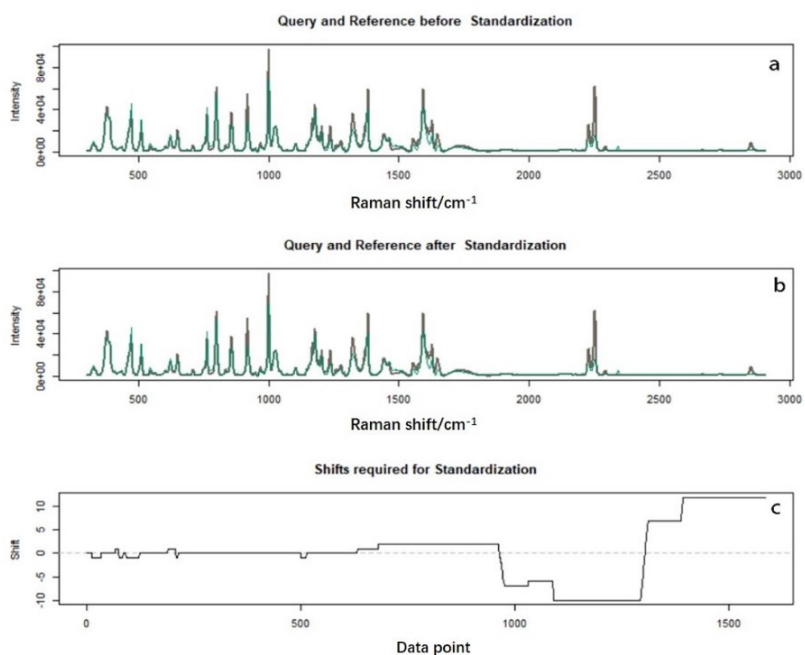

Fig.S1 Standardization result and warping path between i-Raman Plus / PERS-D900-R spectrometer. (a-b) the fused spectra of i-Raman Plus/ PERS-D900-R, which before and after standardization (c) Warping path between i-Raman Plus/ PERS-D900-R spectrometer.

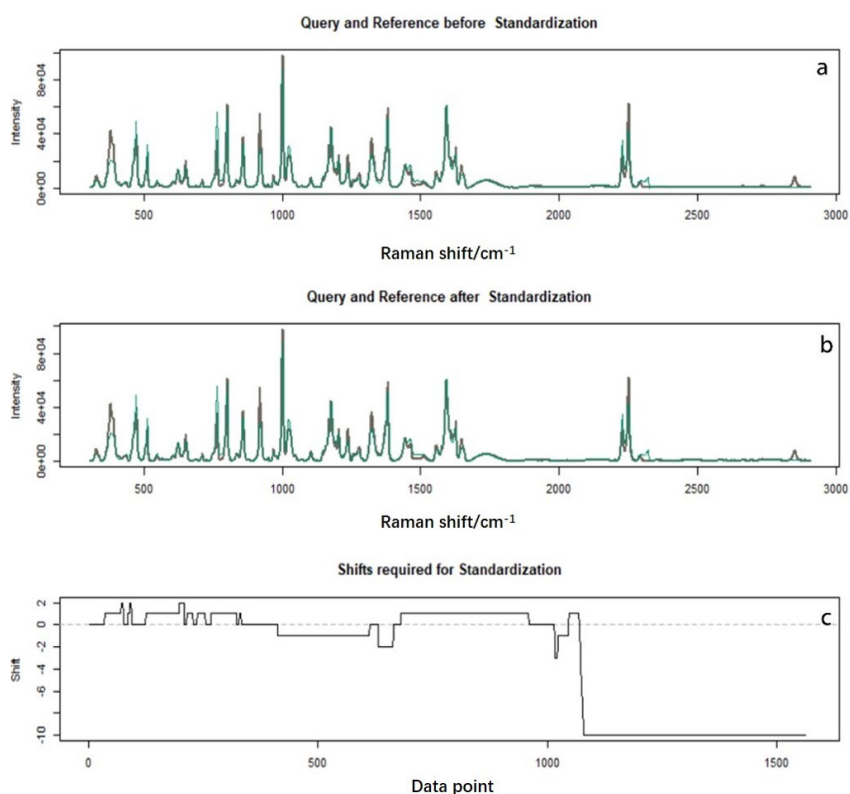

Fig.S2 Standardization result and warping path between i-Raman Plus / A5 268137R spectrometer. (a-b) the fused spectra of i-Raman Plus/ A5 268137R which before and after standardization (c) Warping path between i-Raman Plus/ A5 268137R spectrometer.

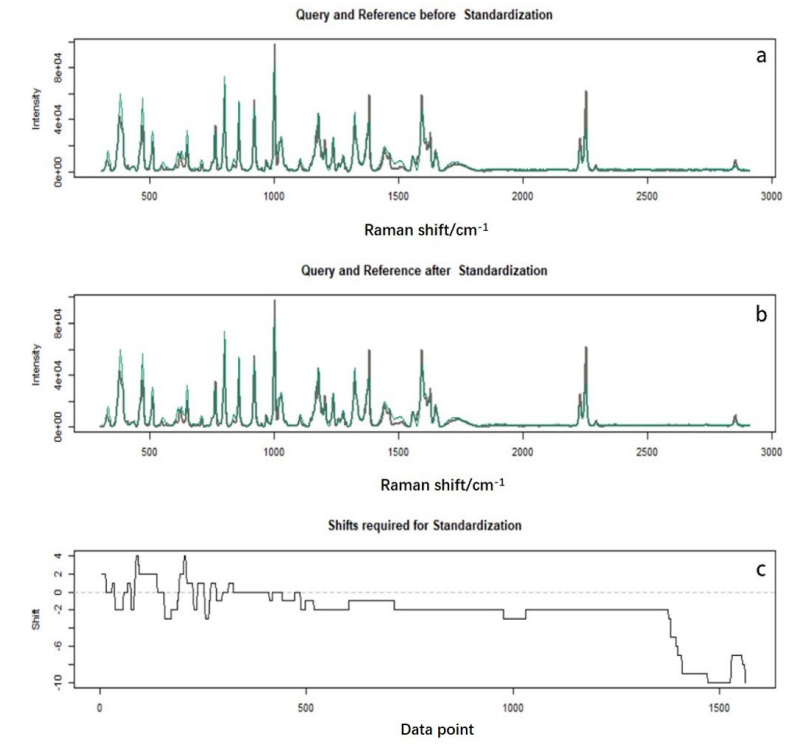

Fig.S3 Standardization result and warping path between i-Raman Plus / PERS-F900 spectrometer. (a-b) the fused spectra of i-Raman Plus./ PERS-F900, which before and after standardization (c) Warping path between i-Raman Plus./ PERS-F900 spectrometer.

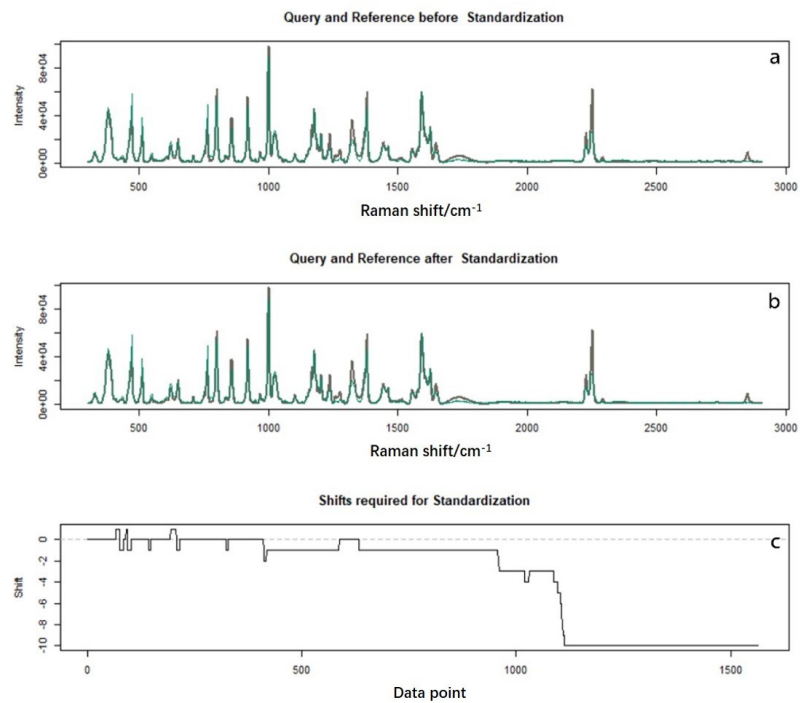

Fig.S4 Standardization result and warping path between i-Raman Plus / PERS-D600 spectrometer. (a-b) the fused spectra of i-Raman Plus / PERS-D600, which before and after standardization (c) Warping path between i-Raman Plus / PERS-D600 spectrometers.

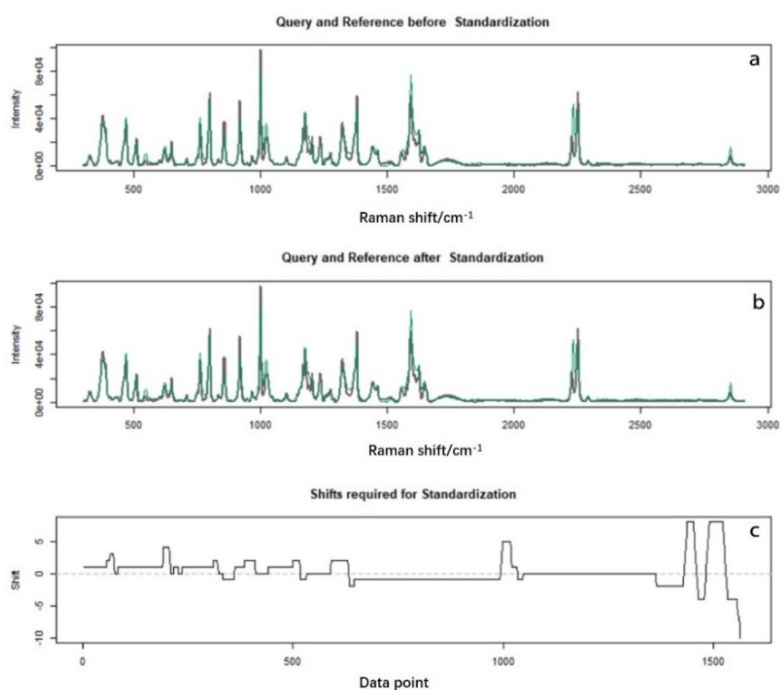

Fig.S5 Standardization result and warping path between i-Raman Plus / PERS-SR530 spectrometer. (a-b) the fused spectra of i-Raman Plus / PERS-SR530, which before and after standardization (c) Warping path between i-Raman Plus / PERS-SR530 spectrometer.

Table S1. Details of the standardized results of each group of Raman instruments  
Please see "Table S1.xlsx" for more details

Table S2. Results of Raman standardization between RS-VPdtw and MWFFT  
Please see "Table S2.xlsx" for more details

Table S3. The results of control experiment using RS-VPdtw

| <u>i-Raman Plus</u> | <u>PERS-F900</u>              |               |
|---------------------|-------------------------------|---------------|
|                     | <u>Samples</u>                | <u>After</u>  |
|                     | <u>Pymetrozine</u>            | <u>0.4736</u> |
|                     | <u>acetone</u>                | <u>0.0864</u> |
|                     | <u>carbendazim</u>            | <u>0.1625</u> |
|                     | <u>Enrofloxacin</u>           | <u>0.2465</u> |
|                     | <u>ascorbic acid</u>          | <u>0.1087</u> |
|                     | <u>hexamethylenetetramine</u> | <u>0.1747</u> |
| <u>aspirin</u>      | <u>Chloramphenicol</u>        | <u>0.0402</u> |
|                     | <u>Lemon yellow</u>           | <u>0.1634</u> |
|                     | <u>Trichloromethane</u>       | <u>0.0213</u> |
|                     | <u>Sudan 1</u>                | <u>0.1432</u> |
|                     | <u>Sodium nitrate</u>         | <u>0.0278</u> |
|                     | <u>Ethanol</u>                | <u>0.0521</u> |

Table S4. MWFFT standardized results preprocessed by airPLS and ALS method

| <u>Samples</u>                | <u>RS-VPdtw</u> | <u>MWFFT</u>  |               |
|-------------------------------|-----------------|---------------|---------------|
|                               |                 | <u>airPLS</u> | <u>ALS</u>    |
| <u>aspirin</u>                | <u>0.9553</u>   | <u>0.8785</u> | <u>0.8968</u> |
| <u>Pymetrozine</u>            | <u>0.9571</u>   | <u>0.8344</u> | <u>0.8516</u> |
| <u>acetone</u>                | <u>0.991</u>    | <u>0.9684</u> | <u>0.9770</u> |
| <u>carbendazim</u>            | <u>0.9842</u>   | <u>0.8454</u> | <u>0.8562</u> |
| <u>Enrofloxacin</u>           | <u>0.9677</u>   | <u>0.9366</u> | <u>0.9603</u> |
| <u>ascorbic acid</u>          | <u>0.9707</u>   | <u>0.9461</u> | <u>0.9601</u> |
| <u>hexamethylenetetramine</u> | <u>0.9514</u>   | <u>0.9055</u> | <u>0.8597</u> |
| <u>Chloramphenicol</u>        | <u>0.9834</u>   | <u>0.9585</u> | <u>0.9435</u> |
| <u>Lemon yellow</u>           | <u>0.9879</u>   | <u>0.9643</u> | <u>0.9785</u> |
| <u>Trichloromethane</u>       | <u>0.9688</u>   | <u>0.9512</u> | <u>0.8974</u> |
| <u>Sudan 1</u>                | <u>0.9189</u>   | <u>0.9553</u> | <u>0.9143</u> |
| <u>Sodium nitrate</u>         | <u>0.9705</u>   | <u>0.9059</u> | <u>0.9079</u> |
| <u>Ethanol</u>                | <u>0.9679</u>   | <u>0.9598</u> | <u>0.9650</u> |
