# Supplementary material for: Standardization of Raman spectra using variable penalty dynamic time warping
Source: Royal Society of Chemistry journal article supplement (doi:10.1039/d1ay00541c), 2021-01-01
Supplement: d1ay00541c2.xlsx [file d1ay00541c2.xlsx]

## Sheet: Table S1
Table.S1 Details of the standardized results of each group of Raman instruments
Samples	RS-VPdtw
	iRaman		PERS-D900-R		A5 268137R		PERS-F900		PERS-D600		PERS-SR530
	Before	After	Before	After	Before	After	Before	After	Before	After	Before	After
aspirin	0.8265	0.928	0.749	0.9517	0.7969	0.9495	0.8071	0.9553	0.7155	0.9364	0.7558	0.9393
Pymetrozine	0.7001	0.9671	0.7522	0.9687	0.9514	0.9643	0.8344	0.9571	0.7323	0.9604	0.9488	0.9704
acetone	0.9702	0.9813	0.9339	0.9871	0.8833	0.9915	0.9797	0.991	0.9856	0.9915	0.9305	0.9846
carbendazim	0.7347	0.9718	0.7913	0.9817	0.9613	0.9794	0.8454	0.9842	0.8259	0.9827	0.9692	0.9862
Enrofloxacin	0.3939	0.9657	0.3683	0.9656	0.796	0.9617	0.3744	0.9677	0.3839	0.9617	0.7534	0.9669
ascorbic acid	0.7956	0.9707	0.7855	0.9468	0.9626	0.9744	0.8186	0.9707	0.7859	0.9684	0.9827	0.9839
hexamethylenetetramine	0.9734	0.9798	0.9441	0.9483	0.6957	0.9653	0.871	0.9514	0.9277	0.9517	0.7352	0.9616
Chloramphenicol	0.9421	0.9802	0.9094	0.987	0.9329	0.9903	0.9356	0.9834	0.8627	0.9777	0.9031	0.983
Lemon yellow	0.8297	0.9814	0.8633	0.9865	0.9798	0.9898	0.9188	0.9879	0.8808	0.9887	0.9884	0.9925
Trichloromethane	0.9847	0.9848	0.9638	0.9758	0.8935	0.9719	0.943	0.9688	0.9542	0.9661	0.8929	0.9689
Sudan 1	0.5225	0.9698	0.4374	0.9272	0.7742	0.929	0.3612	0.9189	0.5117	0.9543	0.9825	0.981
Sodium nitrate	0.9796	0.9885	0.9303	0.9561	0.872	0.9924	0.8953	0.9705	0.9007	0.9668	0.7752	0.9677
Ethanol	0.9684	0.9692	0.919	0.9705	0.8197	0.9545	0.7153	0.9679	0.9563	0.9663	0.9249	0.9734
