# Supplementary material for: Standardization of Raman spectra using variable penalty dynamic time warping
Source: Royal Society of Chemistry journal article supplement (doi:10.1039/d1ay00541c), 2021-01-01
Supplement: d1ay00541c3.xlsx [file d1ay00541c3.xlsx]

## Sheet: Table S2
Table.S2 Results of Raman standardization between RS-VPdtw and MWFFT
Sample	iRaman		PERS-D900-R		A5 268137R		PERS-F900		PERS-D600		PERS-SR530
	RSVPdtw	MWFFT	RSVPdtw	MWFFT	RSVPdtw	MWFFT	RSVPdtw	MWFFT	RSVPdtw	MWFFT	RSVPdtw	MWFFT
aspirin	0.928	0.8143	0.9517	0.749	0.9495	0.8463	0.9553	0.8785	0.9364	0.8833	0.9393	0.8513
Pymetrozine	0.9671	0.8087	0.9687	0.9244	0.9643	0.9544	0.9571	0.8344	0.9604	0.9621	0.9704	0.9703
acetone	0.9813	0.9146	0.9871	0.9466	0.9915	0.9496	0.991	0.9684	0.9915	0.9782	0.9846	0.983
carbendazim	0.9718	0.8476	0.9817	0.8983	0.9794	0.8911	0.9842	0.8454	0.9827	0.8634	0.9862	0.9481
Enrofloxacin	0.9657	0.6747	0.9656	0.9298	0.9617	0.9108	0.9677	0.9366	0.9617	0.8578	0.9669	0.8981
ascorbic acid	0.9707	0.8292	0.9468	0.9241	0.9744	0.8966	0.9707	0.9461	0.9684	0.8717	0.9839	0.9287
hexamethylenetetramine	0.9798	0.9001	0.9483	0.9189	0.9653	0.9347	0.9514	0.9055	0.9517	0.9018	0.9616	0.8836
Chloramphenicol	0.9802	0.8956	0.987	0.9236	0.9903	0.9249	0.9834	0.9585	0.9777	0.9529	0.983	0.968
Lemon yellow	0.9814	0.8667	0.9865	0.9456	0.9898	0.9377	0.9879	0.9643	0.9887	0.9424	0.9925	0.9581
Trichloromethane	0.9848	0.9282	0.9758	0.9514	0.9719	0.9475	0.9688	0.9512	0.9661	0.952	0.9689	0.8866
Sudan 1	0.9698	0.8474	0.9272	0.9092	0.929	0.9291	0.9189	0.9553	0.9543	0.85	0.981	0.9707
Sodium nitrate	0.9885	0.9432	0.9561	0.9204	0.9924	0.9849	0.9705	0.9059	0.9668	0.9004	0.9677	0.9154
Ethanol	0.9692	0.9343	0.9705	0.9459	0.9545	0.9435	0.9679	0.9598	0.9663	0.9204	0.9734	0.9683
